# Supplementary material for: A cross strain Plasmodium falciparum microarray optimized for the transcriptome analysis of Plasmodium falciparum patient derived isolates
Source: PubMed Central journal article supplement — Genom Data. 2016 Jul 20;9:118–25. doi: 10.1016/j.gdata.2016.07.006 (PMC4961827; doi:10.1016/j.gdata.2016.07.006), 2016-07-20
Supplement: mmc1.pdf [file mmc1.pdf]

## Supplementary Information

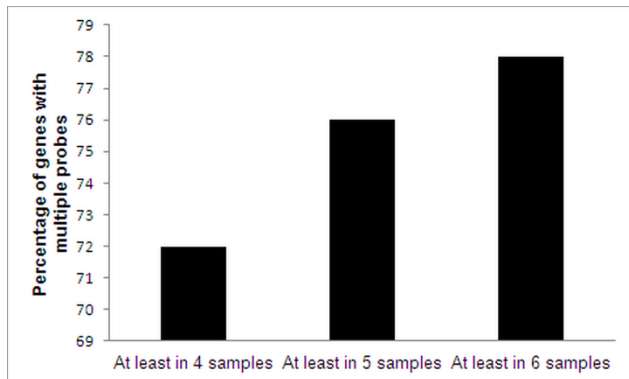

**Supplementary Fig. S1. Correlation between multiple probes representing the same gene and probe detection status.** The percentage of genes with multiple probes having average Pearson correlation between its representing probes  $\geq .8$  was determined for genes with its probes detected in at least 4, 5 and 6 samples out of 13 RNA samples.

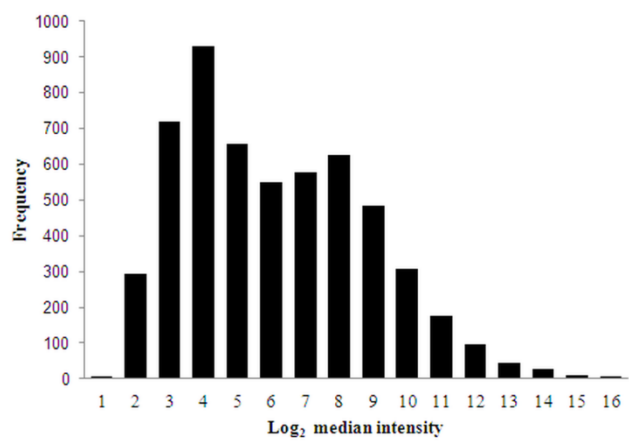

**Supplementary Fig. S2. Probe intensity distribution.** Intensity distribution frequency of probes detected in at least one sample out of 13 samples. Median intensity ( $\text{Log}_2$ ) of probes in 13 RNA samples detected in at least one sample ( $n=5503$ ) was taken and graph was plotted.

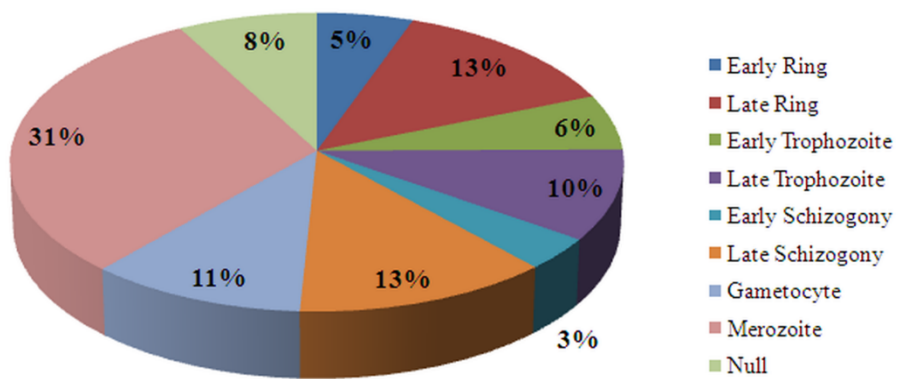

**Supplementary Fig. S3. Maximum expression stage of undetected transcripts in different blood stages of the *P. falciparum*.** The blood stages at which each undetected transcript was reported to be expressed maximally were retrieved from PlasmoDB v8.2 (Aurrecochea et al., 2009).

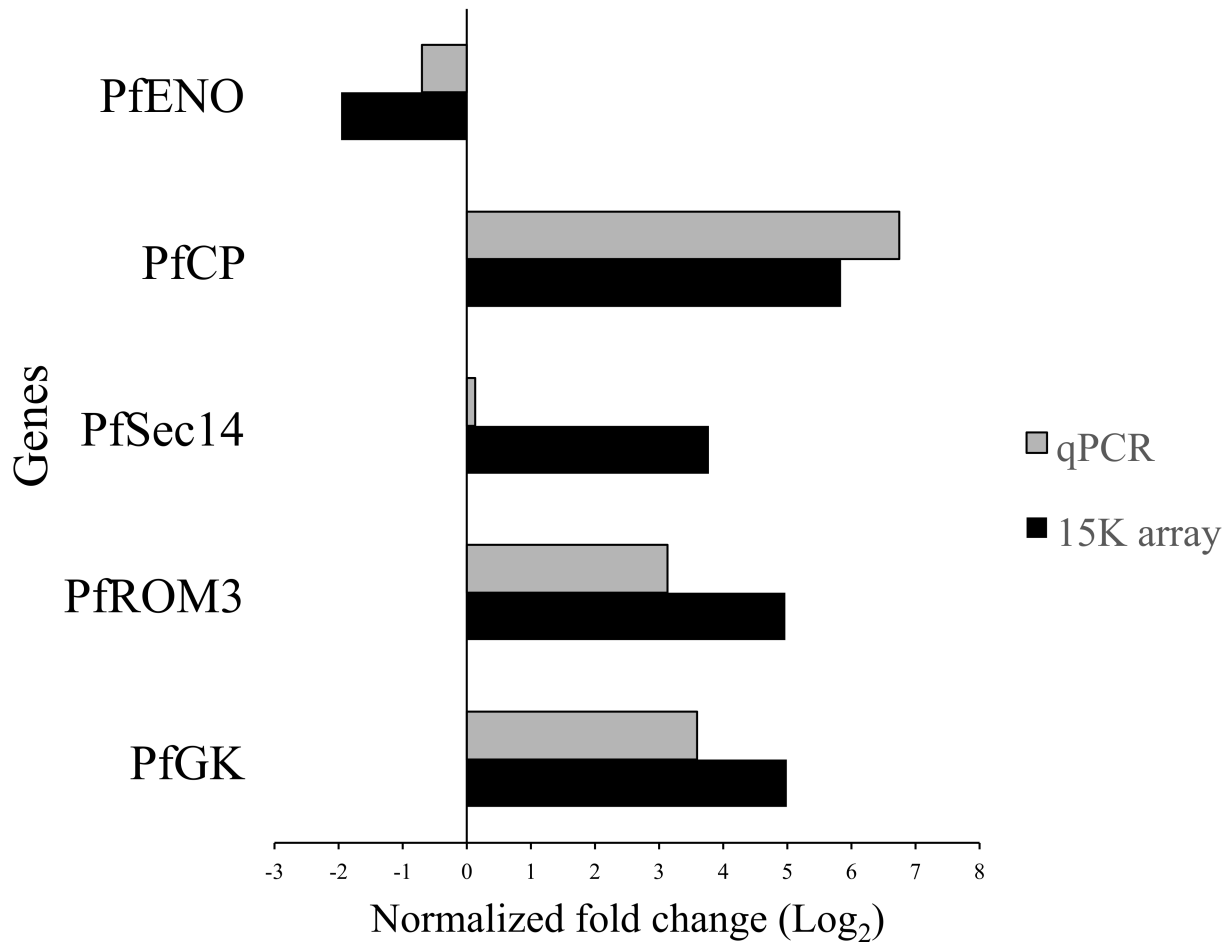

**Supplementary Fig. S4:** Comparison between expression status of selected genes in 15K array and quantitative PCR data.

The correlation between microarray and qPCR data is 0.99 (Spearman's rank correlation).  
 Abbreviations: PfENO, Enolase (PF10\_0155); PfCP, conserved hypothetical protein (PF14\_0683); PfSec14, Sec 14 domain containing protein (PF1280w); PfROM3, Rhomboid protease 3 (MAL8P1.16), PfGK, glycerol kinase (PF13\_0269)

**Supplementary Table S1: Probe distribution in the 15K array**

| Probe Classification                                                        |      | 3D7<br>Strain | HB3<br>Strain | IT4<br>Strain |
|-----------------------------------------------------------------------------|------|---------------|---------------|---------------|
| Probes representing any of the strain                                       | 6120 |               |               |               |
| Probes specific to                                                          |      | 691           | 224           | 41            |
| Common to anyone                                                            |      |               | 5164          |               |
| Common to 3D7 and Hb3                                                       |      |               | 5077          |               |
| Common to 3D7 and IT4                                                       | 13   |               |               |               |
| Common to HB3 and IT4                                                       |      |               |               | 6             |
| Common between 3D7, HB3, IT4                                                |      |               | 9             |               |
| Cross hybridizing probes                                                    | 194  |               |               |               |
| Human Probes (To check the Human RNA Contamination)                         | 22   |               |               |               |
| Number of probes that can't be used for any strain after updated annotation | 48   |               |               |               |

**Supplementary Table S10:** Clinical profile of *P. falciparum* infected malaria patients

| Patient ID | Clinical Presentation                      | Diagnostic tests for malaria |      |     |
|------------|--------------------------------------------|------------------------------|------|-----|
|            |                                            | PBF                          | RMDT | PCR |
| PFU-02     | Uncomplicated                              | +                            | +    | +   |
| PFU-03     | Uncomplicated                              | +                            | +    | +   |
| PFU-04     | Uncomplicated                              | +                            | +    | +   |
| PFU-05     | Uncomplicated                              | +                            | +    | +   |
| PFU-06     | Uncomplicated                              | +                            | +    | +   |
| PFU-08     | Uncomplicated                              | +                            | +    | +   |
| PFC-06     | Jaundice (ser.bil.-8.3)                    | +                            | +    | +   |
| PFC-13     | Jaundice (ser.bil.-4.2)                    | +                            | +    | +   |
| PFC-10     | Jaundice(ser.bil.-11),<br>Anemia (Hb- 5.2) | +                            | +    | +   |
| PFC-11     | Jaundice(ser.bil.-7),<br>Anemia (Hb- 6)    | +                            | +    | +   |
| PFC-12     | Jaundice(ser.bil.-74.3),<br>Anemia (Hb- 5) | +                            | +    | +   |
| PFC-23     | Jaundice (ser.bil.-6.2)                    | +                            | +    | +   |
| PFC-24     | Jaundice (ser.bil.- 5.2)                   | +                            | +    | +   |

Abbreviations: PBF, peripheral blood film; RMDT, rapid malaria diagnostic test; ser.bil, serum bilirubin (in mg/dL); ser.creat, serum creatinine (in mg/dL); Hb, hemoglobin (gm/dL); Platelet (in  $10^3/\text{mm}^3$  of blood)

**Supplementary Table 11:** Primers used in real time qPCR validation experiment

| Amplification/Gene | Primer      | Primer sequence (5' -> 3') |
|--------------------|-------------|----------------------------|
| PF10_0155          | PfENO-F     | ACAGCAGCTATTGGAAAGGATG     |
|                    | PfENO-R     | TTCTGCATGGTGCTCCTGTT       |
| PF14_0683          | PF14_0683-F | ATGTTGGAGGTGTGTGTGAGA      |
|                    | PF14_0683-R | AACCATTCTCTCCGTAACAACA     |
| PFF1280w           | Pfsec14F    | GCAGTGAAACAAAAGGACGTT      |
|                    | Pfsec14R    | GTGTCTCCTTATCACATGGGG      |
| MAL8P1.16          | PfRHOPF     | ACTCGGGGCAACTTATGGTC       |
|                    | PfRHOPR     | AACCCACTAGTTGATGCTCCT      |
| PF13_0269          | PfGKF       | TGATCCAAGTGAAGCTAGCGA      |
|                    | PfGKR       | TCATGCCTCCATCACATCGT       |
| PF07_0073          | PfStRsF     | TCAGGAGCTTTAAACAACGCA      |
|                    | PfStRsR     | GTGCAGCTACCATTGTTCCA       |
